# Supplementary material for: Regional modeling of internal-tide dynamics around New Caledonia. Part 2: Tidal incoherence and implications for sea surface height observability
Source: Copernicus journal article supplement (doi:10.5194/egusphere-2025-95), 2025-01-24
Supplement: Supplementary file [file egusphere-2025-95-AC1-supplement.pdf]

Submitted to Ocean Science: Review of

# **Regional modeling of internal-tide dynamics. Part 2: Tidal incoherence and implications for sea surface height observability**

## **Reviewer #1**

This paper investigates the dynamics and incoherence of the internal tide around New Caledonia using a year-long, high-resolution, realistic numerical simulation at  $1/60^\circ$ . The present paper is a follow-up to a previously published paper (Bendinger et al. 2023, referred to as "Part 1") where the authors focused on the coherent internal tide in the same region, mostly based on the same numerical simulation. Here, the authors address three main aspects related to the incoherent tide: 1) the role and nature of the variability of the tidal conversion term ("local incoherence"), 2) the impact of mesoscale variability on the loss of coherence of the internal tide during its propagation ("far-field incoherence"), and 3) the implications of the non-isotropy and incoherence of the internal tide for the definition of a transition length scale between balanced and unbalanced flow. The latter point is related to the use of altimeter data and the issue of disentangling balanced from unbalanced flow, and is timely in the context of the recently launched SWOT mission.

The manuscript is well written, if somewhat long. The methodology is sound and generally well described. The manuscript addresses different issues (two related to IT dynamics and incoherence, one focusing on the implications for SSH imprints), and I think that in some places - which I flag below - the authors could shorten the text. Nevertheless, it is an interesting contribution to the field of physical and observational oceanography, and I support its publication in Ocean Science. I do have a few comments, which I call "minor" because they do not compromise the coherence and nature of the results reported.

First of all, we would like to thank the reviewer for taking the time to go through our manuscript, for the thorough comments and recommendations which helped improve clarity while pointing out the key findings of our study. In the following, we will address the reviewer's comment and state where changes have been made in the manuscript.

## **Comments & questions**

### **Decomposition of the conversion term (eq. 6 and subsequent paragraph)**

By construction, when the coherent tide is extracted by least-squares regression, the time average (over the same period as the coherent extraction) of a bilinear product between a coherent field and an incoherent field is expected to be close to zero (minimal in a least-squares sense if the relative magnitude of the different coherent frequencies is similar for the different fields) – see Savage et al.

(2020), citing Wunsch (2006).

We appreciate the reviewer’s comment. We modified the paragraph for the sake of clarity: “This classification follows from the orthogonality condition inherent in the least-squares framework: the residual (i.e., the incoherent component) is uncorrelated with the fitted coherent signal and lacks a consistent phase relationship with the tidal forcing. In other words, there is no preferred phasing between coherent and incoherent motions. As a consequence, bilinear products between coherent and incoherent fields tend to average out or remain negligibly small over the regression period (Nash et al., 2012; Buijsman et al., 2017; Savage et al., 2020). However, as we show in the analysis below, these cross terms can account for a substantial fraction of the variability on shorter time scales. We place particular emphasis on assessing their relative importance to better understand temporal variations in the conversion term and the physical mechanisms that drive them.” See Lines 166-173

## Section 4.1

While the authors only mention the influence of varying stratification as a cause of local changes in the baroclinic bottom pressure and, incidentally, the barotropic conversion term, it should be noted that the direct influence of background currents on generation has also been demonstrated in the literature (Dunphy and Lamb 2018, Shakespeare 2020, Dossman et al. 2020).

We thank the reviewer for these references. They are relevant for the study. We included the following paragraph: “Other local processes include the direct influence of background currents, which induce asymmetries in internal-tide generation being enhanced on the upstream side of bathymetric obstacles (Lamb and Dunphy, 2018; Shakespeare, 2020; Dossmann et al., 2020).” See Lines 355-357

Please specify whether  $dP_A$  and  $dP_\phi$  are the amplitude and phase of the incoherent baroclinic bottom pressure  $P - P^{\text{coh}}$ , or whether it is the difference of the amplitude and phase of the total (coherent + incoherent) and coherent baroclinic bottom pressure. Also, is it possible that the phase term cancels out when averaging over the subdomains?

$dP_A$  and  $dP_\phi$  is the amplitude and phase difference between the semidiurnal (coherent + incoherent) and coherent baroclinic bottom pressure. This was mentioned in the caption of Figure 6. But the reviewer is right that this should be clarified earlier. We added the following in Section 4.1: “Here,  $dP_A$  and  $dP_\phi$  are representative of the amplitude and phase difference between the semidiurnal and coherent tide, determined by complex demodulation of  $p_{\text{bc}}^{\text{D2}}(-H)$  and  $p_{\text{bc}}^{\text{coh}}(-H)$ .” See Lines 291-292

Averaging over the subdomains is an interesting aspect since the considered processes can be very local. Both amplitude and phase terms can cancel out when averaging over the domains. For this reason, we decided to show the standard deviation for  $dP_A$  and  $dP_\phi$  in Fig. 5a. Overall, variations of phase are much reduced compared to variations in amplitude. This also has consequences for the conversion term. For Pines Ridge, the conversion anomaly induced by baroclinic bottom pressure variations is at most 10 %. This ratio can be much higher locally. This is also evident from Fig. 4h showing that those conversion anomalies largely vary in space.

## Section 5 and 2.3

I am not convinced of the relevance of the results described in this section. I encourage the authors to clarify how this analysis adds to our understanding of internal tidal dynamics and incoherence.

What is the added value of the ray tracing approach? No quantitative information is derived from it, the only interpretation it is that the ray paths are more scattered in the south compared to the north, which is sort of expected by nature, given the differences of mesoscale activity. Furthermore, it does not provide any significant additional information compared to the results previously presented in Bendinger et al. (2024). Also, the authors mention that the role of variations in phase velocity (related to stratification) remains unknown, but I think it could be incorporated into their ray tracing approach by using the model stratification instead of a climatology (see e.g. Zaron and Egbert 2014). I agree that several papers have found that background currents have a dominant effect on IT refraction, but not that the latter is negligible - to my understanding. Unless this section is enriched or the relevance of the results emphasised, I would suggest that this section be shortened.

We thank the reviewer for this suggestion. First of all, we like to point out that even though the ray tracing methodology is similar to Bendinger et al. (2024), it does not follow the same objective. In Bendinger et al. (2024), the ray tracing served a case study to illustrate that the differences in internal-tide amplitude/phase in glider observations and a virtual glider from numerical modeling output are linked to the refraction of the tidal beam through mesoscale currents. In the presented manuscript, the ray tracing was primarily used to quantify tidal beam dispersion in propagation direction to highlight the contrast in tidal incoherence for the regions north and south of New Caledonia. For the sake of statistical robustness, this was done for daily-averaged horizontal velocity fields of a full-calendar year.

However, we agree with the reviewer that the analysis could be enriched without significantly lengthening the section. To do so, we made the following changes in the methodology:

1. We replaced the climatological stratification by the model stratification alongside the model bathymetry.
2. The reference scenario is now based on the annually averaged stratification and depth-averaged currents.
3. Three experiments are conducted: I. Varying stratification and varying currents, II. Varying stratification and annually averaged currents, III. Annually averaged stratification and varying currents.
4. Consistent with the remaining analysis (see Figure 5, 6, 12, A1, A2), we decided to apply the ray tracing experiment from 3. on the monthly-averaged fields of stratification and currents. Previously, we applied the ray tracing on daily-averaged currents. By doing so, we focus exclusively on mesoscale-induced effects as we did for the internal-tide generation.
5. Additionally, we plotted the ray as a function of the phase offset relative to the reference wave.

Based on the enriched analysis, Section 5.1 has been adapted. The main result remains unchanged, i.e., tidal beam dispersion in propagation direction is increased south of New Caledonia, where mesoscale-eddy activity is higher. The current effect is dominant, however, as pointed out by the reviewer, stratification effects are not negligible. To quantify this, we decided to compute the cumulative refraction which is experienced by a ray in propagation direction for the three different scenarios. To do so, we make use of the group velocity vector to compute the angle representative of the ray's changing orientation (see Table 3, and Lines 390-393). Note that we integrate absolute

values of angular deviation to avoid compensating effects along the ray path.

Please describe the ray tracing experiments in more detail: do you start a ray from each starting point every day to get the different ray paths? How many paths are computed?

Initially, we started a ray for each day (for daily currents) for the two initialization regions north and south of New Caledonia. For each initialization region, in total 365 rays were computed. In the revised manuscript, we rely on monthly-averaged stratification and currents as stated in the above comment. Therefore, we obtain only 12 rays per region, but the main message remains unchanged. A more detailed description of the ray experiments has been added to Section 2.3.

Section 2.3: since this is essentially copied and pasted from Bendinger et al (2024), I suggest shortening this section – possibly keeping the detailed description as an appendix.

Since the methodology has changed compared to the analysis in Bendinger et al. (2024), we kept this section, and adapted it. Therefore, we prefer to keep the description of the ray tracing to ensure that it can be understood without referring to Bendinger et al. (2024).

### **Figure 11 in Summary**

I am rather sceptical that this figure helps to provide a synthetic view of the results. I think the text is sufficient (and even clearer).

We decided to omit Figure 11 since overall it has led to more confusion than clarification.

### **Others, general or specifics**

I do not think that internal tide needs to be hyphenated in the title.

According to the editorial service of Copernicus it does need to be hyphenated. This was also suggested for Part 1. We appreciate the reviewer’s comment, though.

The introduction touches on various aspects of internal incoherence, but does not give much detail on what is known in the region. I understand that the regions have not received much attention until recently (in terms of IT dynamics and incoherence), but it could be seen as a synthesis of what is known. For example, I noticed that New Caledonia can be identified in the incoherent variance fraction estimates of Zaron et al. (2017) or Nelson et al. (2019).

Realistic numerical modeling: Nelson et al. 2019 suggests that >50 % of the SSH variance are explained by nonstationary semidiurnal internal tide. The fraction in Zaron 2017 is much reduced, but it was shown that the SSH variance estimate in wavenumber domain (as commonly done using conventional altimetry) is linked with limitations inherent in the sampling of altimeters which alias the tidal frequencies. The nonstationary fraction of the semidiurnal energy flux lies around 20 %, but becomes increasingly important with increasing distance to the generation sites (up to 80 %) before they diminish (Buijsman et al. 2017). We include part of this in the revised manuscript in Lines 47-48.

Eq. 1: Please briefly explain where this equation comes from (and/or add relevant references).

Former Equation 1 was motivated by Kang and Fringer (2012) and Lahaye et al. (2020). Eventually, we decided to show only the simplified baroclinic energy budget. However, we explicitly mention that the tendency of total energy (kinetic energy and available potential energy) is neglected while considering only hydrostatic pressure work contributions to the baroclinic energy flux. See Lines 146-150

L. 208–210: There is an incoherence here: depth-independent currents correspond only to a barotropic structure, as a mode-1 baroclinic current as a vanishing vertical integral (or average). My understanding is that using depth-independent currents for the ray-tracing approach is rather a simplification, because including the effect of the vertically sheared background current is complicated – unless one is willing to implement a much more complicated approach, as in Duda et al. 2018 or Guo et al (2023).

We agree with the reviewer. To avoid confusion we modified the sentence as follows: “The choice of depth-averaged currents is simplistic and relies on the assumption that vertically sheared background currents associated with mesoscale eddies do not alter the qualitative picture of ray trajectories that are obtained.” See Lines 198-200

On l.304, the authors claim that local effects associated with local stratification changes are associated with a modulation of the amplitude of the baroclinic bottom pressure, while remote effects are associated with pressure phase variations. Is there any evidence or previous work to support this claim? While I suppose the former can be anticipated from linear theory (e.g. following St Laurent and Garrett 2002), I do not see a straightforward explanation for the impact of remote waves being associated only with phase variations.

We appreciate the reviewer’s comment. Remote effects can induce phase and amplitude variations. Local effects induce amplitude variations only (with the phase remaining unchanged). This is explicitly mentioned in Lines 289-290. We also refer to Zilberman et al. (2011).

l.325: Again, how are variations in near-bottom stratification and bottom pressure related? Is this straightforward from the above equation for  $p(z)$ .

This is an important point to discuss. We included the following paragraph in the revised manuscript: “Pressure perturbations and stratification changes are directly linked assuming a second-order Taylor expansion of pressure around depth  $z_0$ :

$$p(z) \sim p(z_0) + \left. \frac{\partial p}{\partial z} \right|_{z_0} (z - z_0) + \left. \frac{\partial^2 p}{\partial z^2} \right|_{z_0} \frac{(z - z_0)^2}{2}, \quad (1)$$

In hydrostatic balance ( $\frac{\partial p}{\partial z} = -\rho g$ ), and expressed via stratification ( $\frac{\partial^2 p}{\partial z^2} = \rho_0 N^2$ ), this can be written as:  $p(z) \sim p(z_0) - \rho g(z - z_0) + \rho_0 N^2 \frac{(z - z_0)^2}{2}$ . By taking the time derivative and assuming adiabatic motion ( $\frac{\partial \rho}{\partial t} = 0$ ), we obtain the relation:

$$\frac{\partial p}{\partial t} \sim \rho_0 \frac{\partial N^2}{\partial t} \frac{(z - z_0)^2}{2}. \quad (2)$$

In practice, this translates to decreasing (increasing) stratification, which corresponds to more widely (closely) spaced isopycnals leading to weaker (stronger) baroclinic pressure anomalies.” See Lines 309-316

Figure 5 caption: missing parenthesis at end of first sentence.

This has been corrected.

l.409: the delay is in hours, not days. Also, the delays obtained are shorter in the south than in the north, which is somewhat contradictory with the fact that IT is more incoherent there.

The delay is indeed in hours. Note that with the new analysis we decided to omit the group arrival of semidiurnal rays to focus more on the cumulative refraction due to mesoscale stratification and/or currents.

## References (not mentioned in the manuscript

- [Dossmann et al. 2020]: Dossmann, Y., Shakespeare, C., Stewart, K., & Hogg, A. McC. (2020). Asymmetric Internal Tide Generation in the Presence of a Steady Flow. *Journal of Geophysical Research: Oceans*, **125**, e2020JC016503.
- [Dunphy & Lamb 2018]: Lamb, K. G., & Dunphy, M. (2018). Internal wave generation by tidal flow over a two-dimensional ridge: energy flux asymmetries induced by a steady surface trapped current. *Journal of Fluid Mechanics*, **836**, 192–221.
- [Nelson et al. 2019]: Nelson, A. D., et al. (2019). Toward Realistic Nonstationarity of Semidiurnal Baroclinic Tides in a Hydrodynamic Model. *Journal of Geophysical Research: Oceans*, **124**, 6632–6642.
- [St. Laurent & Garrett 2002]: St. Laurent, L., & Garrett, C. (2002). The Role of Internal Tides in Mixing the Deep Ocean. *Journal of Physical Oceanography*, **32**, 2882–2899.
- [Savage et al. 2020]: Savage, A. C., Waterhouse, A. F., & Kelly, S. M. (2020). Internal tide nonstationarity and wave-mesoscale interactions in the Tasman Sea. *Journal of Physical Oceanography*, 1–52. <https://doi.org/10.1175/JPO-D-19-0283.1>
- [Shakespeare 2020]: Shakespeare, C. J. (2020). Interdependence of internal tide and lee wave generation at abyssal hills: global calculations. *Journal of Physical Oceanography*. <https://doi.org/10.1175/JPO-D-19-0179.1>
- [Wunsch 2006]: Wunsch, C. (2006). *Discrete Inverse and State Estimation Problems: With Geophysical Fluid Applications*. Cambridge University Press. <https://doi.org/10.1017/CB09780511535949>
- [Zaron & Egbert 2014]: Zaron, E. D., & Egbert, G. D. (2014). Time-Variable Refraction of the Internal Tide at the Hawaiian Ridge. *Journal of Physical Oceanography*, **44**, 538–557.
